# Supplementary material for: Symmetric dimethylarginine concentrations in healthy neonatal foals and mares
Source: PubMed Central journal article supplement — J Vet Intern Med. 2021 Nov 5;35(6):2891–6. doi: 10.1111/jvim.16295 (PMC8692187; doi:10.1111/jvim.16295), 2021-11-05
Supplement: JVIM-35-2891-s001.pdf [file JVIM-35-2891-s001.pdf]

**Supplemental Table 1. Samples removed following outlier analysis.**

| Animal | Foal/Mare | Time Period Removed | SDMA (µg/dL) | sCr (mg/dL) | Justification for Removal                                                                                                      |
|--------|-----------|---------------------|--------------|-------------|--------------------------------------------------------------------------------------------------------------------------------|
| 1      | Foal      | Birth               | 100          | 2.8         | Birth and 1-4 Days SDMA values were both at the upper limit of detection. Foal had no further chemistries.                     |
|        |           | 1 to 4 Days         | 100          | 1.7         |                                                                                                                                |
| 2      | Foal      | Birth               | 100          | 16.6        | Birth SDMA was at the upper limit of detection, birth sCr was well above all others observed. Foal had no further chemistries. |
| 3      | Mare      | Birth               | 75           | 2.3         | Birth SDMA was much higher than other mares. Mare had no further chemistries.                                                  |
| 4      | Mare      | Birth               | 93           | 3.2         | Birth SDMA was much higher than other mares. Mare had no further chemistries.                                                  |
| 5      | Foal      | 5 to 10 Days        | 85           | 2.2         | Birth sample missing. Foal had no further chemistries.                                                                         |
| 6      | Mare      | 20+ Days            | 96           | 1.8         | Birth sample missing. SDMA jumped from 11 µg/dL at 5-10 Day to 96 µg/dL at 20+ Days.                                           |

SDMA, symmetric dimethylarginine; sCr, serum creatinine
